# Supplementary material for: The nanoscale spatial organization of B-cell receptors on immunoglobulin M– and G–expressing human B-cells
Source: PubMed Central journal article supplement — Mol Biol Cell. 2017 Feb 15;28(4):511–23. doi: 10.1091/mbc.E16-06-0452 (PMC5305258; doi:10.1091/mbc.e16-06-0452), 2017-02-15
Supplement: supp_E16-06-0452v1_CombinedSupMats.pdf [file supp_E16-06-0452v1_CombinedSupMats.pdf]

# Supplemental Materials

*Molecular Biology of the Cell*

Lee et al.

### ***Calcium influx assay***

Human peripheral blood B cells were analyzed for calcium influx using the Fluo-4 NW Calcium Assay Kit (Invitrogen, Life Technologies). Briefly, the fluo-4 solution was prepared by resuspending the powdered dye in 10 ml of the provided assay buffer and 2.5 mM probenecid. Cells were resuspended in 1 mL of the fluo-4 solution for 30 min at 37°C in 5% CO<sub>2</sub>, followed by incubation for 30 min at RT before analysis by flow cytometry. Cells were analyzed on an LSRII for 60 s to establish a baseline, and the cells were then briefly removed from the LSRII and stimulated with Alexa Fluor 647-conjugated F(ab) of antibodies specific for IgM or IgG at 300 nM (Jackson ImmunoResearch), or biotinylated F(ab')<sub>2</sub> antibody specific for IgM, IgG, and IgA (10 µg/mL) with streptavidin (Invitrogen). The cells were mixed and immediately placed back on the LSRII and analyzed for additional 600 s.

### ***Immobilization of purified human IgM and IgG***

To sparsely immobilize purified human IgM and IgG covalently, clean coverslips were treated with 5% (wt/vol) 3-amino 3-aminopropyl trimethoxysilane (APTMS) in acetone for 15 min at room temperature, washed with acetone and PBS, then incubated with 0.25% (wt/vol) glutaraldehyde in PBS for 30 min. 10 pM of purified IgM and IgG from human serum (Invitrogen) with 5 µM BSA in PBS were added to the functionalized coverslips and incubated for 30 min at room temperature in a humid chamber. After extensive washing in PBS, coverslips were blocked with 10% BSA (wt/vol) in PBS at room temperature for 2 hours, then labeled with Alexa Fluor 647-conjugated F(ab) of antibodies specific for IgM or IgG (Jackson ImmunoResearch) at 300 nM for 10 min on ice and washed extensively with PBS before imaging.

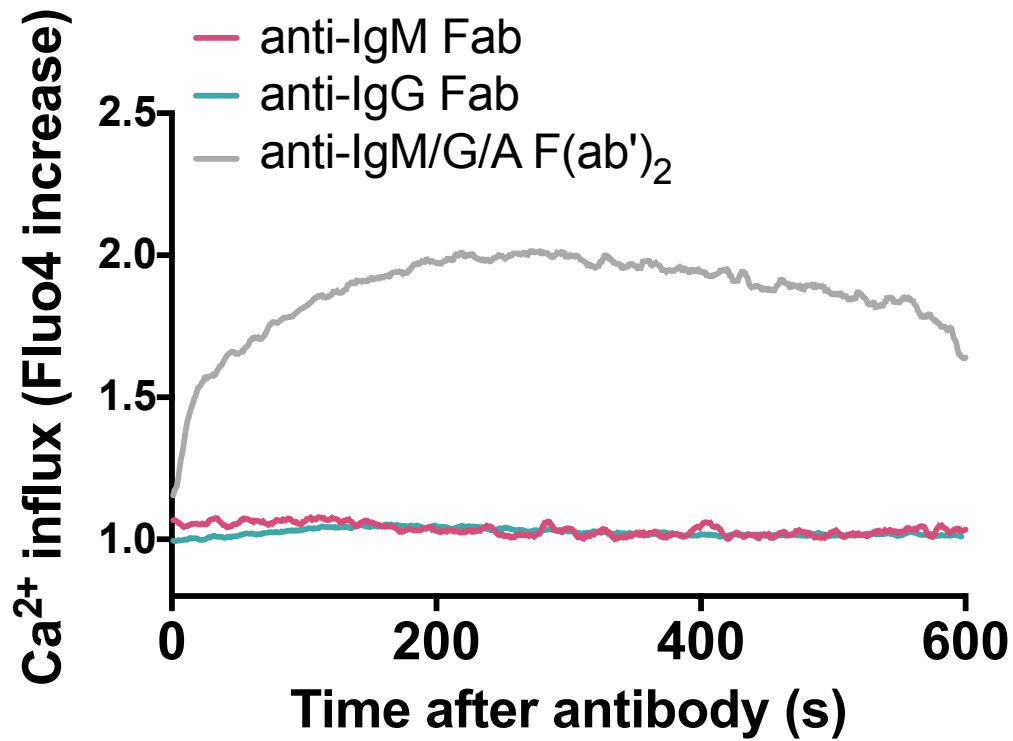

**Figure S1.** Flow cytometry analysis of Ca<sup>2+</sup> influx in human peripheral blood B cells. Kinetics of the Ca<sup>2+</sup> response as Fluo-4 fold increase to baseline in 10 min after the addition of anti-IgM Fab (red line), anti-IgG Fab (blue line), and anti-IgM/G/A F(ab')<sub>2</sub> (gray line) are shown.

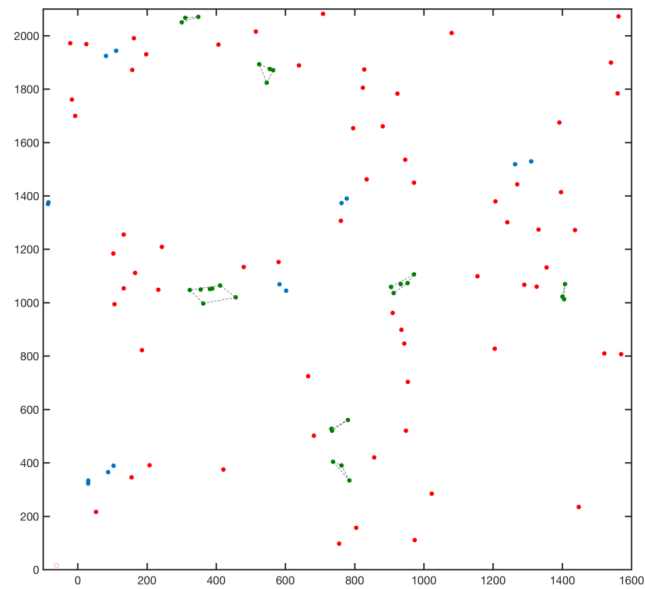

**Figure S2.** Actual localized peaks of IgG BCRs on a representative contact area of IgG-expressing resting B cells identified as monomers (red), dimers (blue), and protein islands of more than three receptors (green) by the cluster analysis algorithm. Dashed black line shows the protein island perimeter.

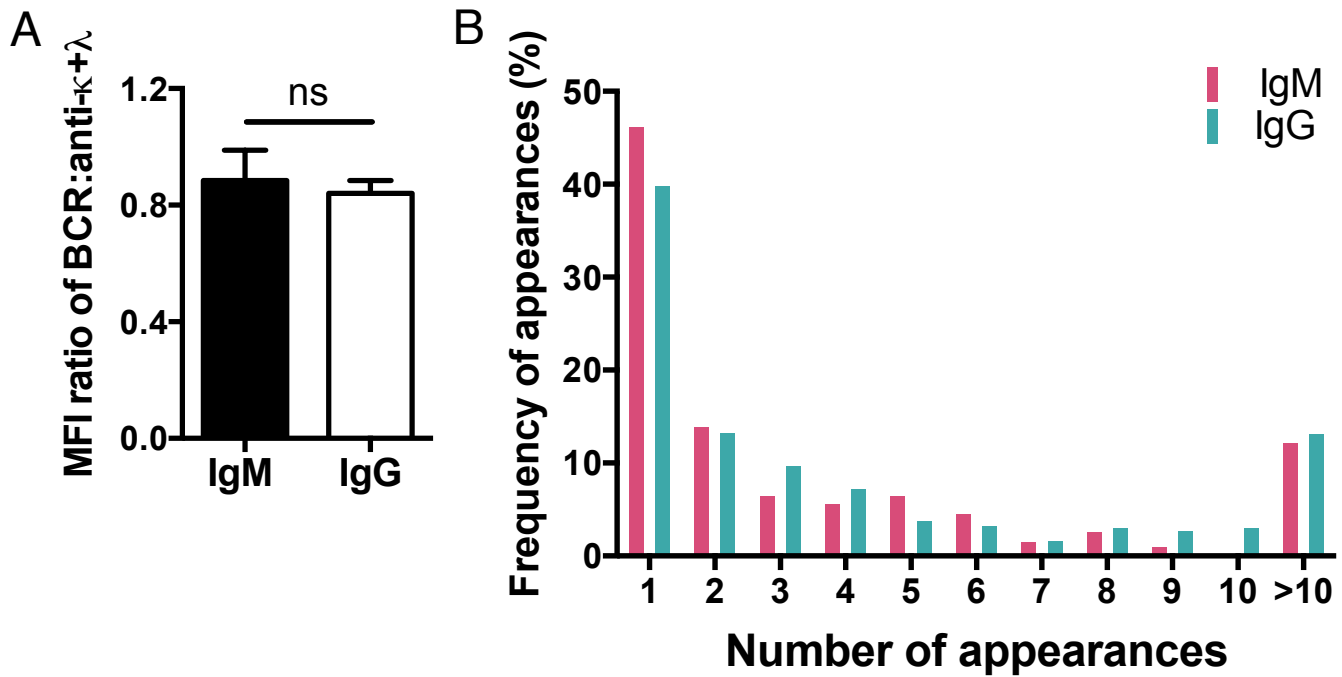

**Figure S3.** (A) Ratio of mean fluorescence intensity (MFI) of Alexa Fluor 647-Fab anti-IgM:DyLight 488-F(ab')<sub>2</sub> anti-κ+λ (IgM) and Alexa Fluor 647-Fab anti-IgG:DyLight 488-F(ab')<sub>2</sub> anti-κ+λ (IgG) were quantified and means and SEMs are plotted ( $n = 14$  cells for each conditions). Unpaired  $t$  test were performed comparing the ratio of IgM versus IgG expressing cells. ns, non-significant. (B) Frequency of appearances of Alexa Fluor 647-Fab anti-IgM (red) and -IgG (blue) on surfaces with sparsely immobilized purified human IgM and IgG labeled with saturating conditions of Alexa Fluor 647-Fab anti-IgM and -IgG.
